# Supplementary material for: Early Events in Actin Cytoskeleton Dynamics and E-Cadherin-Mediated Cell-Cell Adhesion during Epithelial-Mesenchymal Transition
Source: Cells. 2020 Feb 29;9(3):578. doi: 10.3390/cells9030578 (PMC7140442; doi:10.3390/cells9030578)
Supplement: Supplementary file 1 [file cells-09-00578-s001.zip]

Archive with 9 entries (9 files):
- Supplementary_information-final.pdf
- Video S1.avi
- Video S2.avi
- Video S3.avi
- Video S4.avi
- Video S5.avi
- Video S6.avi
- Video S7.avi
- Video S8.avi
